# Supplementary material for: Monodisperse WO3 hierarchical spheres synthesized via a microwave assisted hydrothermal method: time dependent morphologies and gas sensing characterization
Source: Royal Society of Chemistry journal article supplement (doi:10.1039/c4ra01946f), 2014-01-01
Supplement: c4ra01946f1.pdf [file c4ra01946f1.pdf]

## Electronic Supplementary Information

### Monodisperse WO<sub>3</sub> hierarchical spheres synthesized via a microwave assisted hydrothermal method: time dependent morphologies and gas sensing characterization

Zhenyu Wang,<sup>a</sup> Xin Zhou,<sup>a</sup> Zhubo Li,<sup>b</sup> Yichen Zhuo,<sup>a</sup> Yuan Gao,<sup>\*a</sup> Qiuyue Yang,<sup>a</sup> Xiaowei Li<sup>a</sup> and Geyu Lu<sup>\*a</sup>

<sup>a</sup> State Key Laboratory on Integrated Optoelectronics, College of Electronic Science and Engineering, Jilin University, Changchun 130012, People's Republic of China. Fax: +86 431 85167808; Tel: +86 431 85167808; E-mail: gaoyuan@jlu.edu.cn, [lgy@jlu.edu.cn](mailto:lgy@jlu.edu.cn)

<sup>b</sup> Department of Microelectronics and Nanoelectronics, College of Information Science Technology, Tsinghua University, Beijing 100084, People's Republic of China.

#### 1. A typical SEM image with higher magnification of the products obtained with the reaction time of 60 min

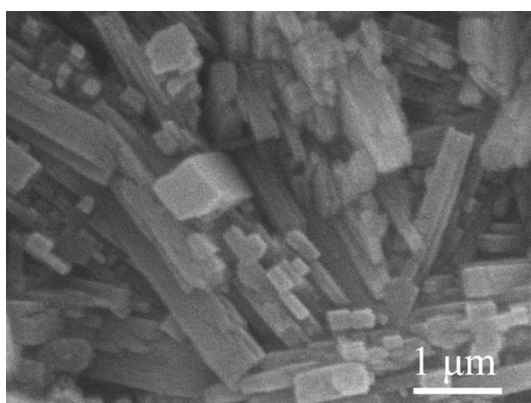

**Fig. S1** A typical SEM image with higher magnification of the products obtained with the reaction time of 60 min.

2. A typical SEM image of the products obtained with the reaction time of 1 min

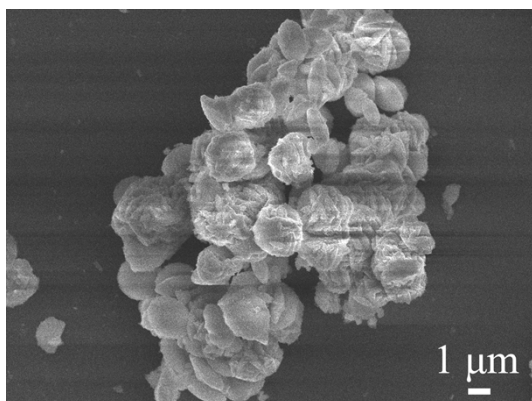

**Fig. S2** A typical SEM image of the products obtained with the reaction time of 1 min.
